# Supplementary material for: Medical students’ perception on fecal microbiota transplantation
Source: PubMed Central journal article supplement (PMC6788000; doi:10.1186/s12909-019-1804-7), 2019-10-11
Supplement: 12909_2019_1804_MOESM1_ESM.pdf [file 12909_2019_1804_MOESM1_ESM.pdf]

# Questionnaire regarding fecal microbiota transplantation (FMT)

\* Required

1. What is your specialty? \*

---

2. How would you rate your level of knowledge regarding FMT? (indications, procedure, benefits, risks, etc.) \*

Mark only one oval.

- very low
- low
- medium
- high
- very high

3. Where have you heard, seen or read about FMT? Please indicate how often you use each source. \*

Mark only one oval per row.

|                               | Never                 | Rarely                | Sometimes             | Frequently            | Very frequently       |
|-------------------------------|-----------------------|-----------------------|-----------------------|-----------------------|-----------------------|
| Articles                      | <input type="radio"/> | <input type="radio"/> | <input type="radio"/> | <input type="radio"/> | <input type="radio"/> |
| Courses                       | <input type="radio"/> | <input type="radio"/> | <input type="radio"/> | <input type="radio"/> | <input type="radio"/> |
| Conferences                   | <input type="radio"/> | <input type="radio"/> | <input type="radio"/> | <input type="radio"/> | <input type="radio"/> |
| Documentaries                 | <input type="radio"/> | <input type="radio"/> | <input type="radio"/> | <input type="radio"/> | <input type="radio"/> |
| The internet                  | <input type="radio"/> | <input type="radio"/> | <input type="radio"/> | <input type="radio"/> | <input type="radio"/> |
| Colleagues                    | <input type="radio"/> | <input type="radio"/> | <input type="radio"/> | <input type="radio"/> | <input type="radio"/> |
| Other sources (specify below) | <input type="radio"/> | <input type="radio"/> | <input type="radio"/> | <input type="radio"/> | <input type="radio"/> |

4. Other sources:

---

5. Have you indicated FMT for a patient before? \*

Mark only one oval.

- yes
- no

**6. In what cases do you know of FMT to be indicated? (multiple items may be chosen) \***

*Check all that apply.*

- Clostridium difficile infection
- ulcerative colitis
- Crohn's disease
- irritable bowel syndrome
- obesity
- Other: \_\_\_\_\_

**7. What adverse effects may appear following FMT? (multiple items may be chosen) \***

*Check all that apply.*

- abdominal discomfort
- nausea
- cramps
- bloating
- diarrhea
- constipation
- transmission of diseases undetected by screening procedures
- neurotransmitter imbalance
- Other: \_\_\_\_\_

**8. Would you be willing to recomend FMT to your patients when such an indication exists? \***

*Mark only one oval.*

- definitely yes
- probably yes
- only after exhausting all other medical options
- probably not
- definitely not

**9. What do you consider to be the optimal timing for performing FMT? \***

*Mark only one oval.*

- as a first line of treatment
- after the first recurrence
- after the second recurrence
- after the third recurrence
- as a last resort
- it should never be used

10. **What do you consider to be the optimal delivery method for FMT? \***

*Mark only one oval.*

- colonoscopy
- enemas
- naso-jejunal tube
- frozen oral capsules
- I don't know/I don't have an opinion
- Other: \_\_\_\_\_

11. **Would you be willing to enroll patients in a controlled clinical study evaluating FMT efficiency? \***

*Mark only one oval.*

- yes
- no
- not sure

12. Several sentences regarding FMT are presented below. Please read them carefully and then select the level that best describes your agreement with each one. \*

Mark only one oval per row.

|                                                                                                  | Strongly disagree     | Somewhat disagree     | Neither agree, nor disagree | Somewhat agree        | Strongly agree        |
|--------------------------------------------------------------------------------------------------|-----------------------|-----------------------|-----------------------------|-----------------------|-----------------------|
| 1. I feel uncomfortable talking to patients about FMT                                            | <input type="radio"/> | <input type="radio"/> | <input type="radio"/>       | <input type="radio"/> | <input type="radio"/> |
| 2. A more socially acceptable name would make discussions about FMT easier                       | <input type="radio"/> | <input type="radio"/> | <input type="radio"/>       | <input type="radio"/> | <input type="radio"/> |
| 3. I believe patients would accept FMT as treatment                                              | <input type="radio"/> | <input type="radio"/> | <input type="radio"/>       | <input type="radio"/> | <input type="radio"/> |
| 4. More controlled clinical studies on FMT are needed before it can be used in clinical practice | <input type="radio"/> | <input type="radio"/> | <input type="radio"/>       | <input type="radio"/> | <input type="radio"/> |
| 5. I believe there is currently enough evidence for FMT                                          | <input type="radio"/> | <input type="radio"/> | <input type="radio"/>       | <input type="radio"/> | <input type="radio"/> |
| 6. I do not believe in the long-term results of FMT                                              | <input type="radio"/> | <input type="radio"/> | <input type="radio"/>       | <input type="radio"/> | <input type="radio"/> |
| 7. FMT is a risky procedure                                                                      | <input type="radio"/> | <input type="radio"/> | <input type="radio"/>       | <input type="radio"/> | <input type="radio"/> |
| 8. FMT is a long and complicated process                                                         | <input type="radio"/> | <input type="radio"/> | <input type="radio"/>       | <input type="radio"/> | <input type="radio"/> |
| 9. FMT can lead to transmitting of infections                                                    | <input type="radio"/> | <input type="radio"/> | <input type="radio"/>       | <input type="radio"/> | <input type="radio"/> |
| 10. FMT poses a high risk of disease exacerbation                                                | <input type="radio"/> | <input type="radio"/> | <input type="radio"/>       | <input type="radio"/> | <input type="radio"/> |
| 11. FMT does not represent a permanent solution to the medical problem                           | <input type="radio"/> | <input type="radio"/> | <input type="radio"/>       | <input type="radio"/> | <input type="radio"/> |
| 12. FMT belongs to alternative medicine                                                          | <input type="radio"/> | <input type="radio"/> | <input type="radio"/>       | <input type="radio"/> | <input type="radio"/> |
| 13. I find FMT somewhat disgusting                                                               | <input type="radio"/> | <input type="radio"/> | <input type="radio"/>       | <input type="radio"/> | <input type="radio"/> |
| 14. FMT is a safer treatment than standard medical treatments                                    | <input type="radio"/> | <input type="radio"/> | <input type="radio"/>       | <input type="radio"/> | <input type="radio"/> |
| 15. FMT is a riskier medical procedure than blood transfusion                                    | <input type="radio"/> | <input type="radio"/> | <input type="radio"/>       | <input type="radio"/> | <input type="radio"/> |
| 16. FMT has a negative impact on patient dignity (feelings of shame, stigma, etc.)               | <input type="radio"/> | <input type="radio"/> | <input type="radio"/>       | <input type="radio"/> | <input type="radio"/> |

|                                                                                                           | Strongly disagree     | Somewhat disagree     | Neither agree, nor disagree | Somewhat agree        | Strongly agree        |
|-----------------------------------------------------------------------------------------------------------|-----------------------|-----------------------|-----------------------------|-----------------------|-----------------------|
| 17. I believe the procedure would be supported within my institution                                      | <input type="radio"/> | <input type="radio"/> | <input type="radio"/>       | <input type="radio"/> | <input type="radio"/> |
| 18. Results from veterinary medicine represent strong evidence for using FMT in human medicine            | <input type="radio"/> | <input type="radio"/> | <input type="radio"/>       | <input type="radio"/> | <input type="radio"/> |
| 19. FMT can do more harm than good                                                                        | <input type="radio"/> | <input type="radio"/> | <input type="radio"/>       | <input type="radio"/> | <input type="radio"/> |
| 20. FMT is a therapy comparable to probiotics                                                             | <input type="radio"/> | <input type="radio"/> | <input type="radio"/>       | <input type="radio"/> | <input type="radio"/> |
| 21. I believe FMT is a promising therapy for many diseases                                                | <input type="radio"/> | <input type="radio"/> | <input type="radio"/>       | <input type="radio"/> | <input type="radio"/> |
| 22. I believe this procedure would be covered by insurance in the future                                  | <input type="radio"/> | <input type="radio"/> | <input type="radio"/>       | <input type="radio"/> | <input type="radio"/> |
| 23. Donor screening is a complex and costly procedure                                                     | <input type="radio"/> | <input type="radio"/> | <input type="radio"/>       | <input type="radio"/> | <input type="radio"/> |
| 24. It's easier for someone to be "admitted to Harvard" than fulfill the criteria to become a stool donor | <input type="radio"/> | <input type="radio"/> | <input type="radio"/>       | <input type="radio"/> | <input type="radio"/> |
| 25. I am interested in learning more about FMT and its practice                                           | <input type="radio"/> | <input type="radio"/> | <input type="radio"/>       | <input type="radio"/> | <input type="radio"/> |
| 26. I believe the procedure should only be carried out in medical centers specialized in FMT              | <input type="radio"/> | <input type="radio"/> | <input type="radio"/>       | <input type="radio"/> | <input type="radio"/> |
| 27. I believe FMT should become a usual procedure in every clinic/hospital                                | <input type="radio"/> | <input type="radio"/> | <input type="radio"/>       | <input type="radio"/> | <input type="radio"/> |
| 28. I believe the procedure would be more accessible (duration, costs, logistics) if a stool bank existed | <input type="radio"/> | <input type="radio"/> | <input type="radio"/>       | <input type="radio"/> | <input type="radio"/> |
| 29. I believe the procedure would be more easily accepted by doctors and patients if a stool bank existed | <input type="radio"/> | <input type="radio"/> | <input type="radio"/>       | <input type="radio"/> | <input type="radio"/> |
| 30. I believe it is easier for patients if the donor is anonymous rather than someone they know           | <input type="radio"/> | <input type="radio"/> | <input type="radio"/>       | <input type="radio"/> | <input type="radio"/> |

**13. Would you like to add anything else regarding FMT?**

---

---

---

---

---

---
